# Supplementary material for: Antibacterial performance of polymer quaternary ammonium salt–capped silver nanoparticles onBacillus subtilisin water
Source: Royal Society of Chemistry journal article supplement (doi:10.1039/c9ra05944j), 2019-01-01

## **Electronic Supplementary Information for**

### **Antibacterial performance of polymer quaternary ammonium salt - capped silver nanoparticles on *Bacillus subtilis* in water**

**Jingyu Wang, Minghao Sui\*, Zhanfang Ma, Hongwei Li, Bojie Yuan**

State Key Laboratory of Pollution Control and Resource Reuse, Shanghai Institute of Pollution Control and Ecological Security, School of Environmental Science and Engineering, Tongji University, 1239 Siping Road, Shanghai 200092, People's Republic of China.

\*Corresponding author: Tel: +86-21-65982691; Fax: +86-21-65986313, E-mail address: [minghaosui@tongji.edu.cn](mailto:minghaosui@tongji.edu.cn)

## Supplementary information captions:

**Fig. S1** The physicochemical properties of PVP-AgNPs. (a) UV–visible spectrum; (b) TEM image.

**Fig. S2** Inactivation efficiency of *B. subtilis* with silver ions corresponding to different release from 1.0 mg/L of PQAS-AgNPs or PVP-AgNPs. Reaction conditions: reaction time = 60 min, T = 25 °C, initial concentration of *B. subtilis*: 10<sup>6</sup> CFU/mL.

**Fig. S3** Inactivation efficiency of *B. subtilis* with silver ions corresponding to different pH values (pH = 4.9, 7.1, 8.9). Reaction conditions: reaction time = 60 min, T = 25 °C, initial concentration of *B. subtilis*: 10<sup>6</sup> CFU/mL.

**Fig. S4** Effect of Cl<sup>-</sup> on antibacterial efficacy to *B. subtilis* of PQAS. Reaction conditions: [PQAS] = 1.0 mg/L, contact time = 60 min, pH = 7.1, T = 25 °C, initial concentration of *B. subtilis*: 10<sup>6</sup> CFU/mL.

**Fig. S5** Effect of Cl<sup>-</sup> on antibacterial efficacy to *B. subtilis* of PVP-AgNPs. Reaction conditions: [AgNPs] = 10.0 mg/L, contact time = 60 min, pH = 7.1, T = 25 °C, initial concentration of *B. subtilis*: 10<sup>6</sup> CFU/mL.

**Fig. S6** Effect of HA on antibacterial efficacy to *B. subtilis* of PVP-AgNPs. Reaction conditions: [AgNPs] = 10.0 mg/L, contact time = 60 min, pH = 7.1, T = 25 °C, initial concentration of *B. subtilis*: 10<sup>6</sup> CFU/mL.

**Fig. S7** FCM results of *B. subtilis* after treated by PVP-AgNPs. Among them, (a) to (d) represent the concentration of PVP-AgNPs is 1.0, 2.0, 5.0, 10.0 mg/L, respectively. Reaction conditions: reaction time = 15 min, pH = 7.1, T = 25 °C, initial concentration of *B. subtilis*: 10<sup>6</sup> CFU/mL.

**Fig. S8** FCM results statistics of *B. subtilis* after treated by PQAS-AgNPs and PVP-AgNPs. Reaction conditions: reaction time = 15 min, pH = 7.1, T = 25 °C, initial concentration of *B. subtilis*:  $10^6$  CFU/mL.

**Fig. S9** Changes of ATP of *B. subtilis* after treated by PVP-AgNPs. Reaction conditions: reaction time = 15 min, pH = 7.1, T = 25 °C, initial concentration of *B. subtilis*:  $10^6$  CFU/mL.

**Fig. S10** ATP results statistics of *B. subtilis* after treated by PQAS-AgNPs and PVP-AgNPs. Reaction conditions: reaction time = 15 min, pH = 7.1, T = 25 °C, initial concentration of *B. subtilis*:  $10^6$  CFU/mL.

**Fig. S1**

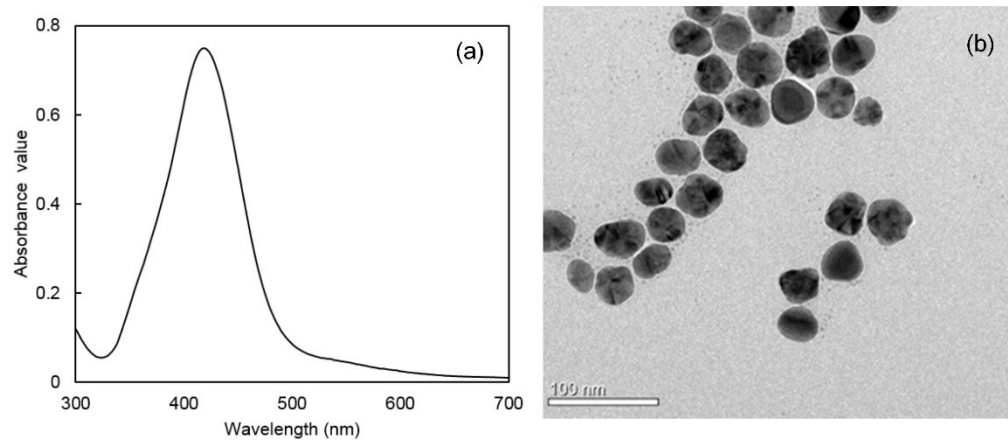

**Fig. S2**

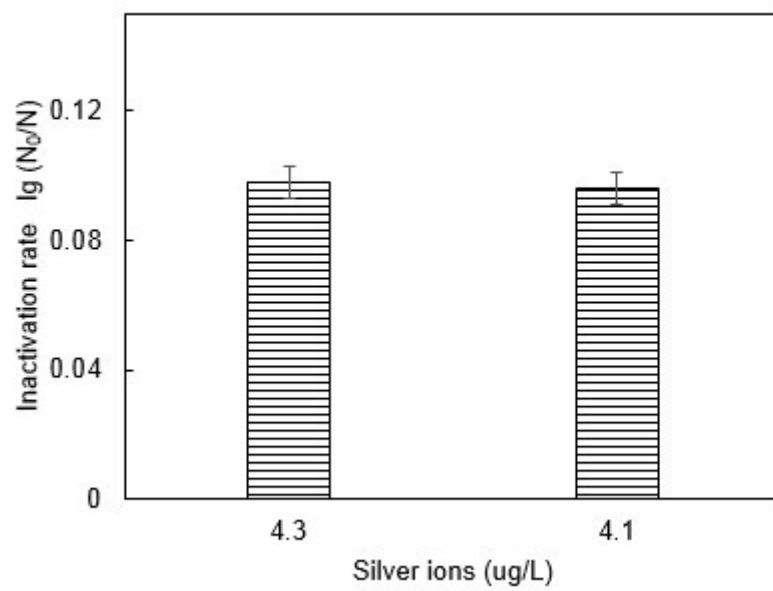

**Fig. S3**

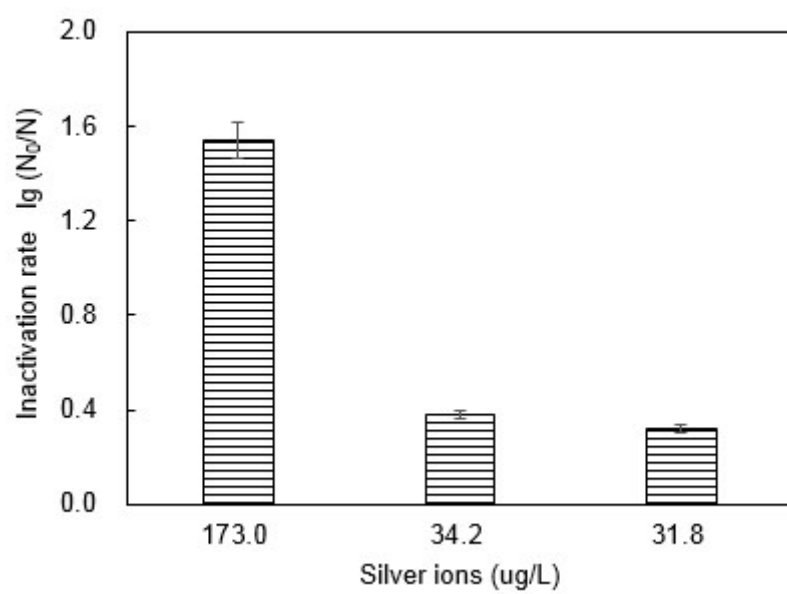

Fig. S4

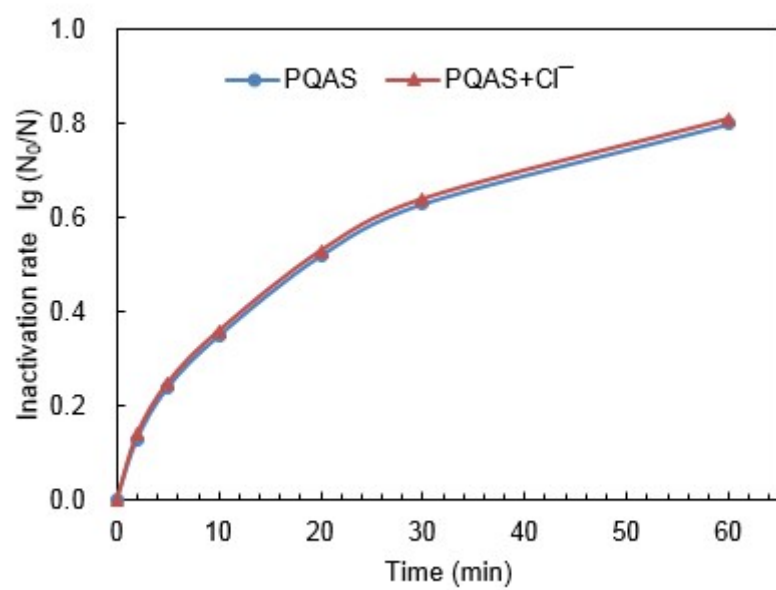

Fig. S5

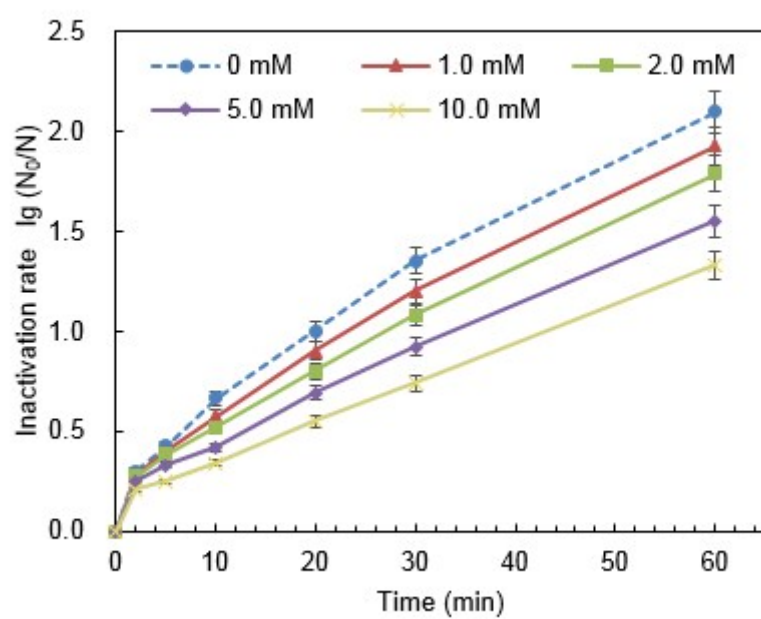



**Fig. S6**

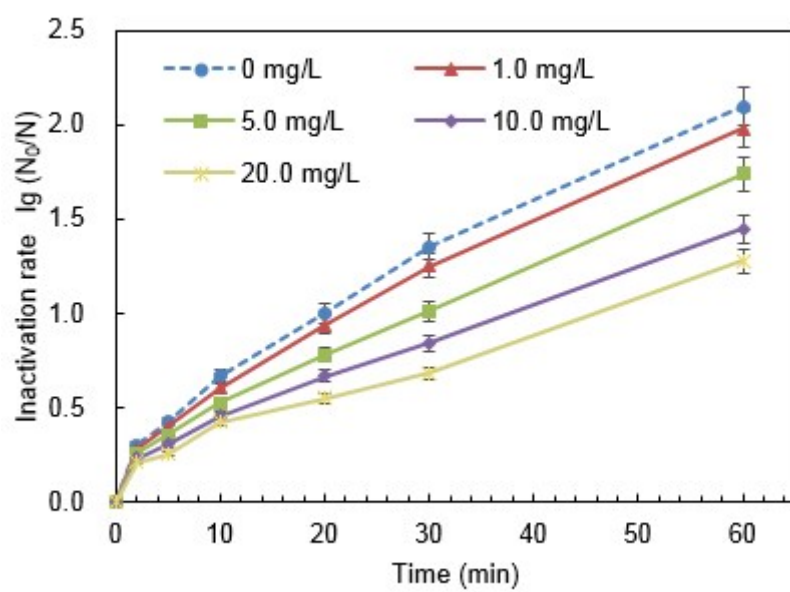

**Fig. S7**

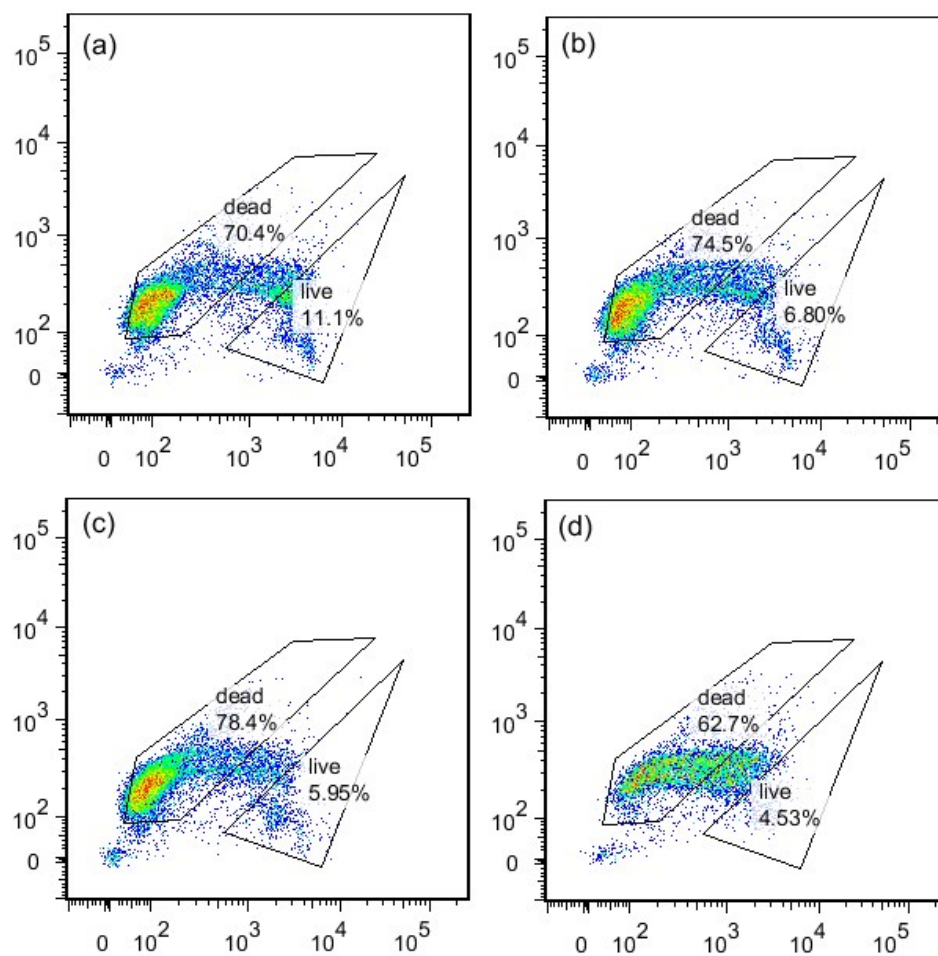

**Fig. S8**

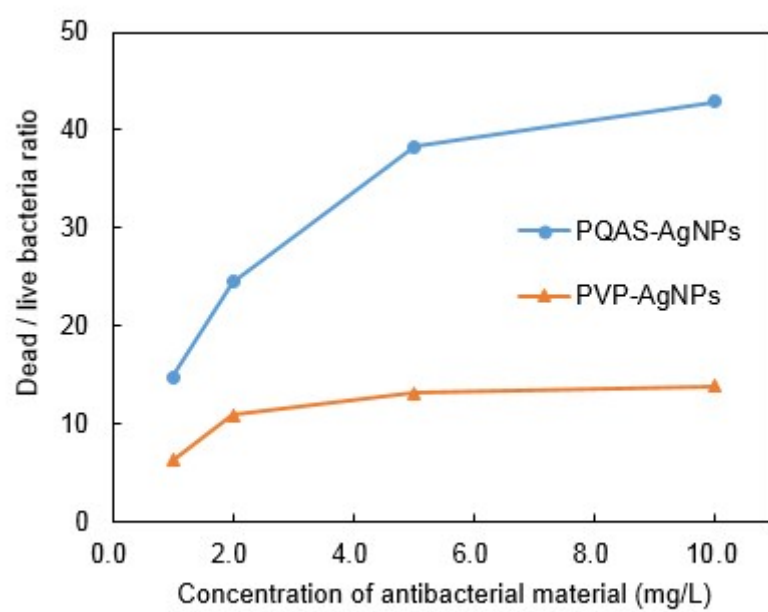

**Fig. S9**

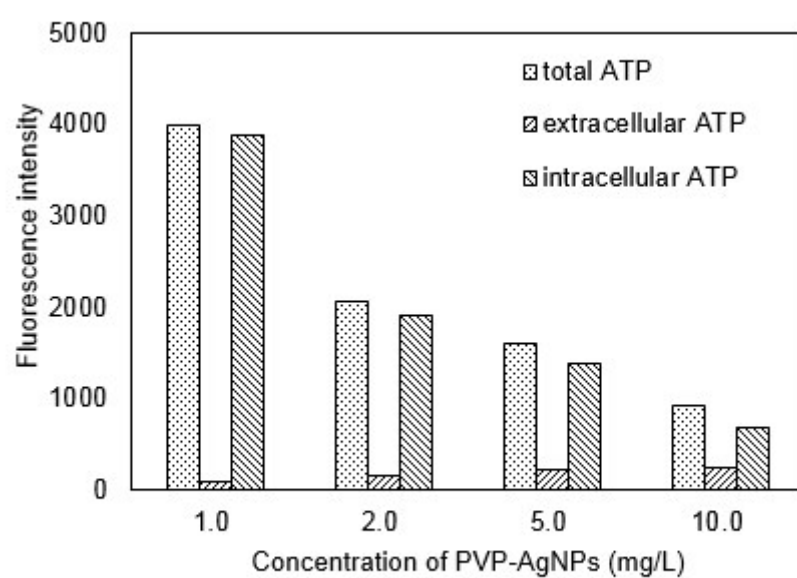

**Fig. S10**

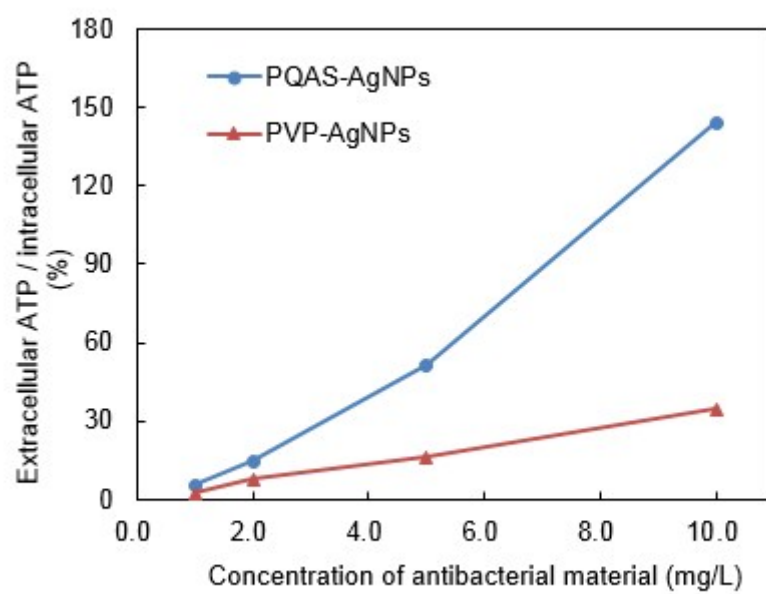

Supplement: c9ra05944j1.pdf [file c9ra05944j1.pdf]
